# Supplementary material for: miR-155 Predicts Long-Term Mortality in Critically Ill Patients Younger than 65 Years
Source: Hindawi journal article supplement (doi:10.1155/2019/6714080), 2019-02-24
Supplement: f1 [file 6714080.f1.pdf]

**A.**

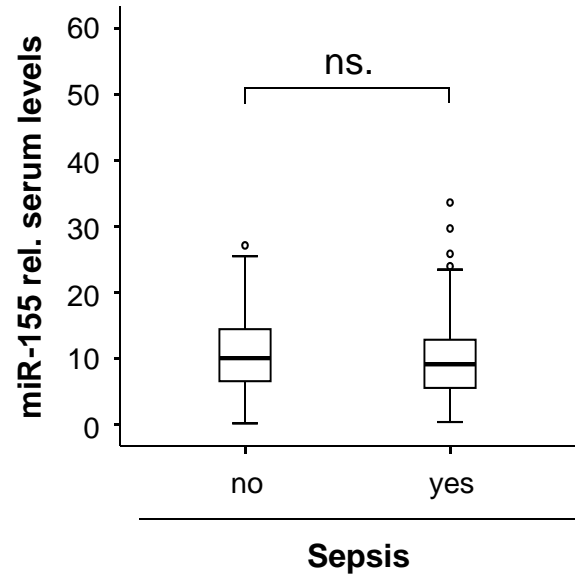

**B.**

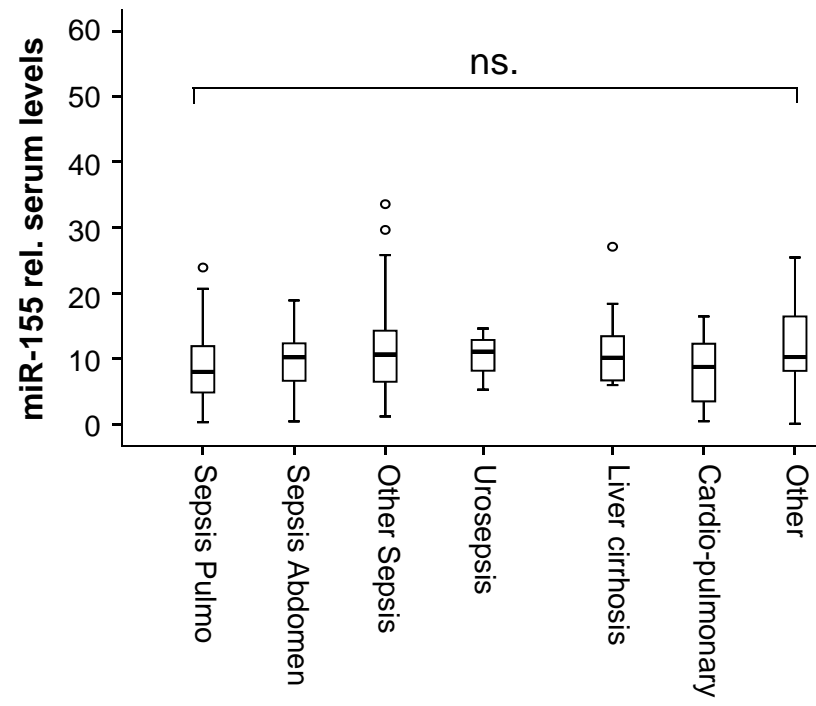

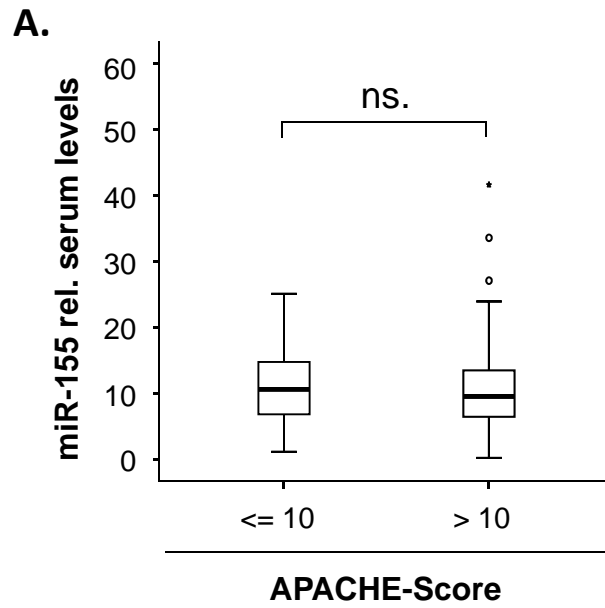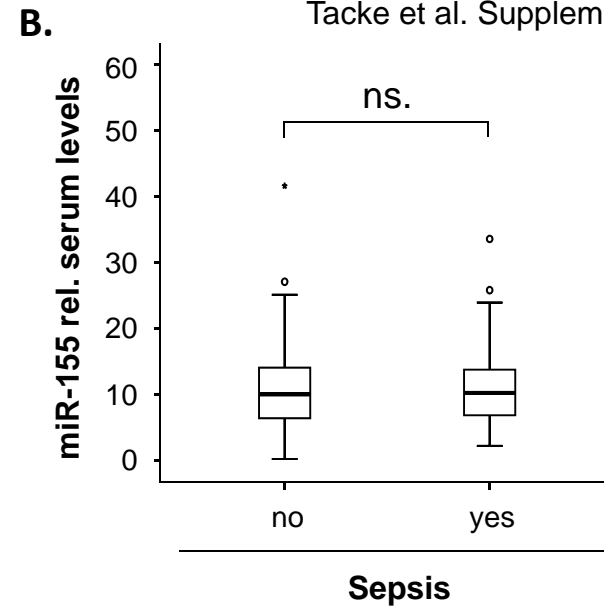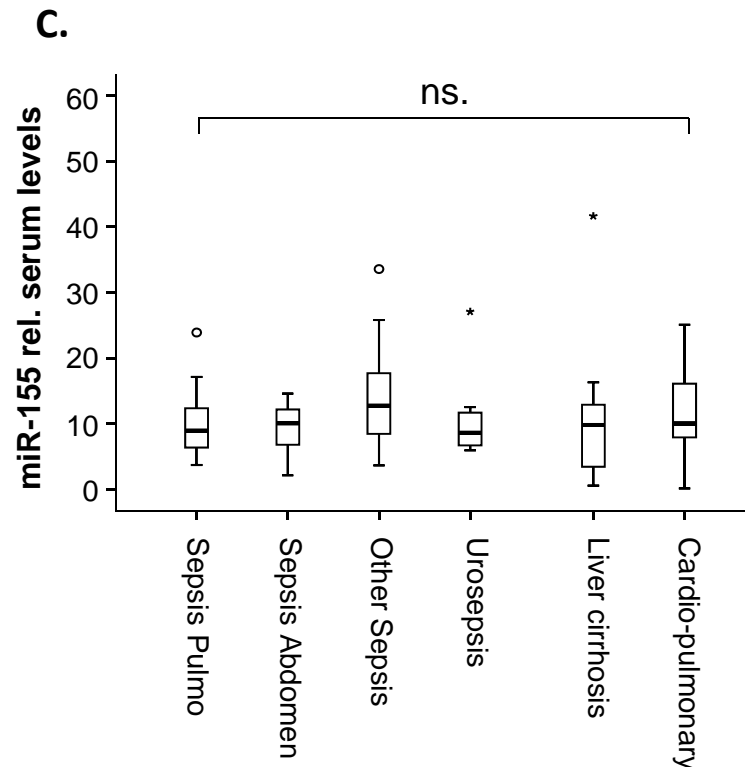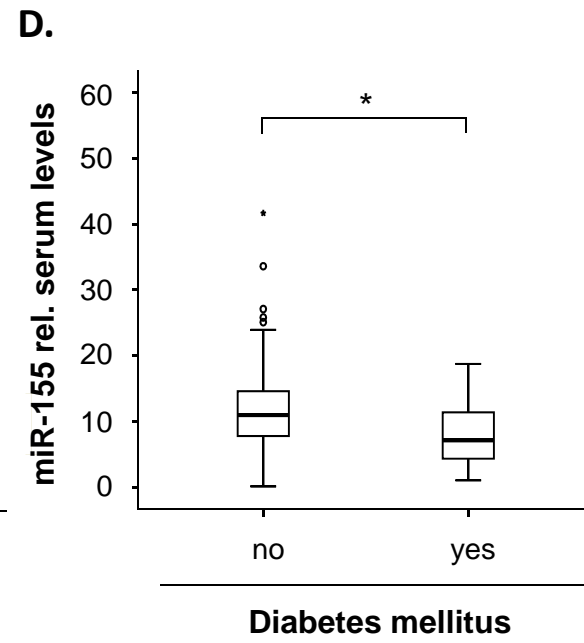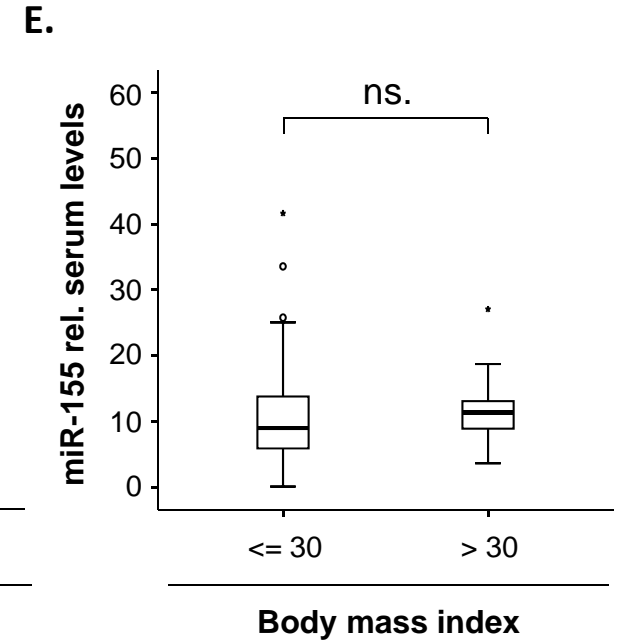

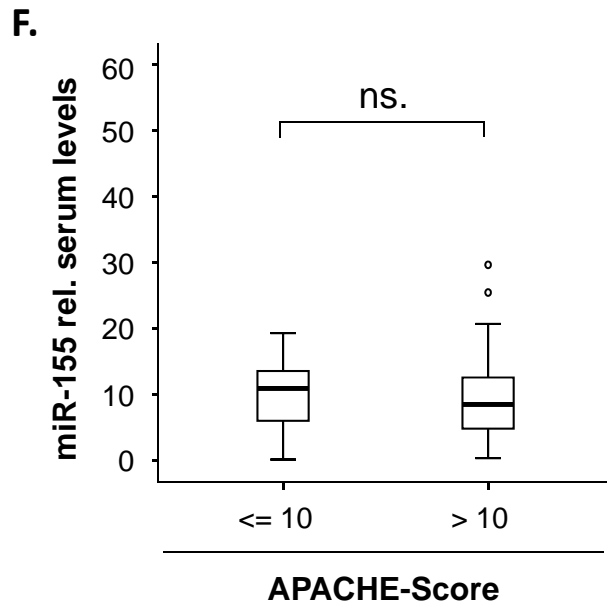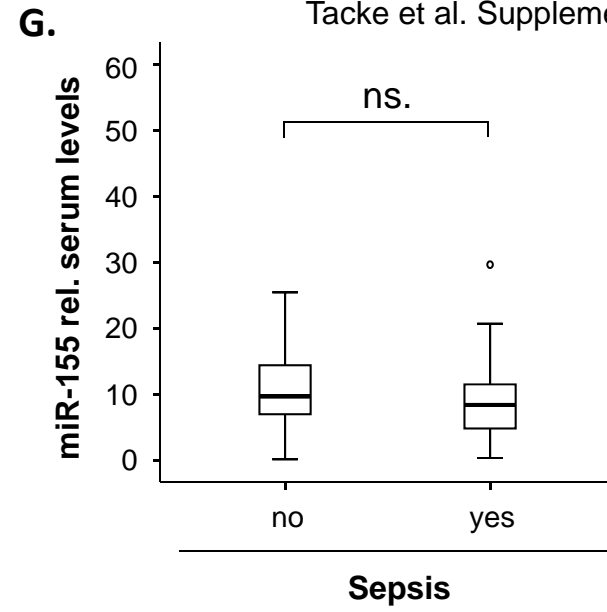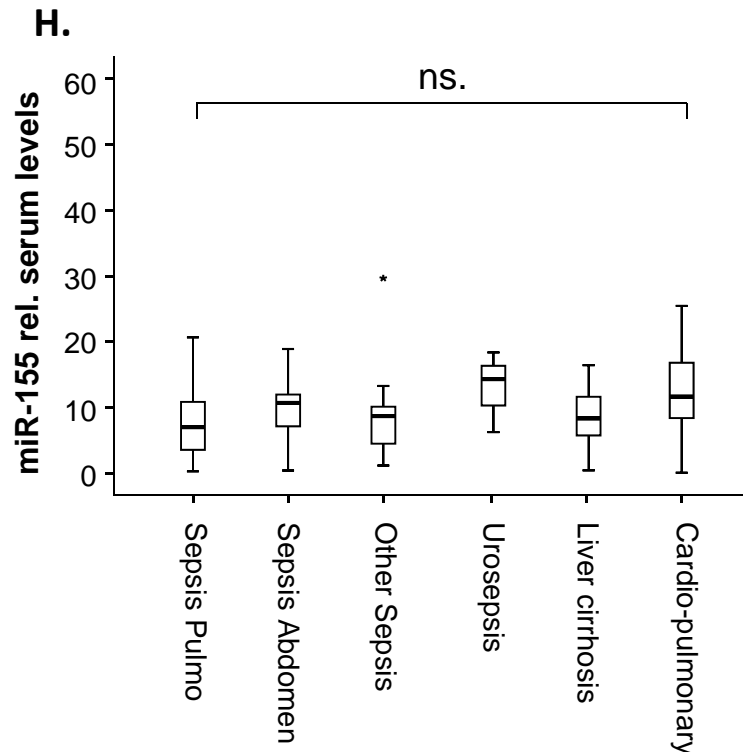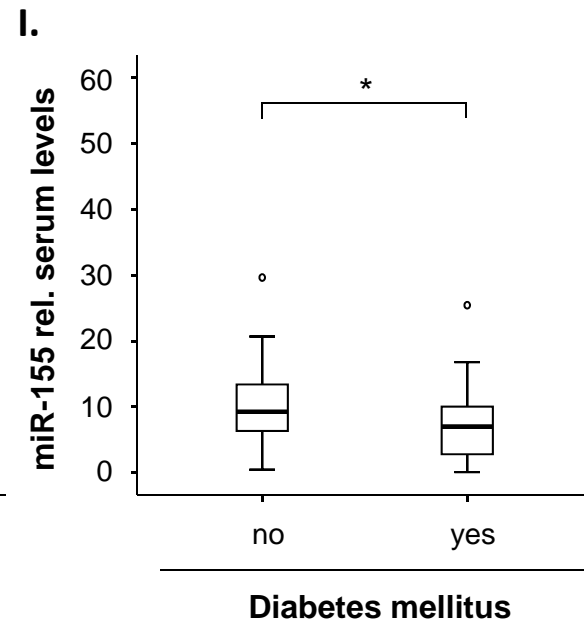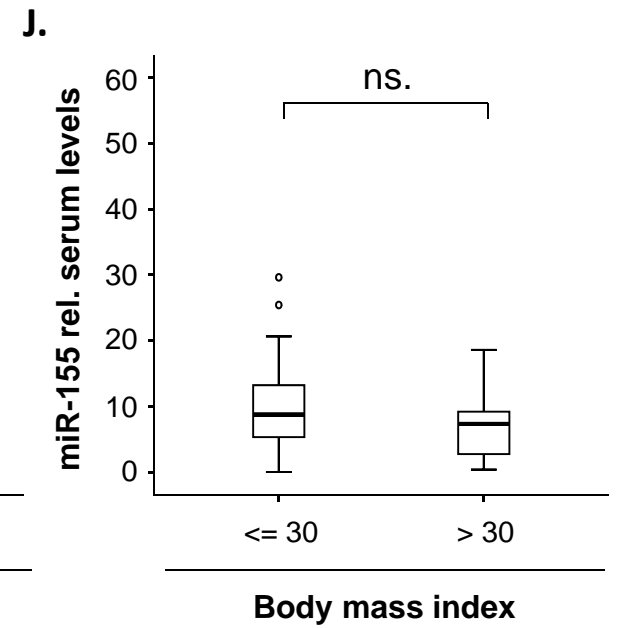

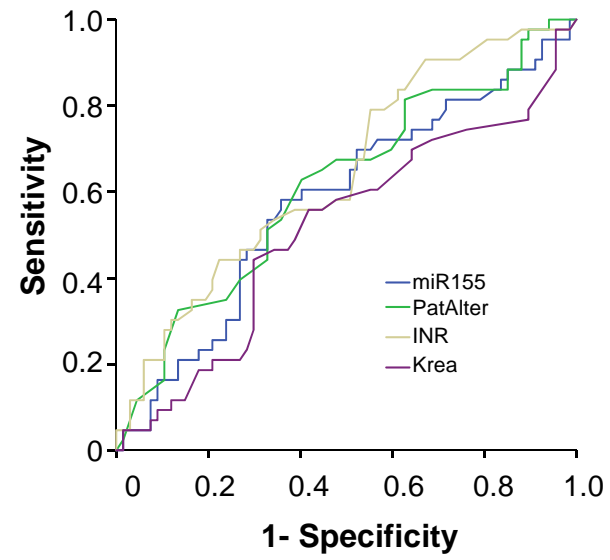

**Supplementary Table 1A.** Disease etiology of the study population (< 65 years)

|                                    | <b>sepsis</b> | <b>non-sepsis</b> |
|------------------------------------|---------------|-------------------|
|                                    | n=74          | n=51              |
| <b>Sepsis critical illness</b>     |               |                   |
| Source of infection n (%)          |               |                   |
| Pulmonary                          | 34 (27.2%)    |                   |
| Abdominal                          | 17 (13.6%)    |                   |
| Urogenital                         | 3 (2.4%)      |                   |
| Other                              | 20 (16.0%)    |                   |
| <b>Non-sepsis critical illness</b> |               |                   |
| n (%)                              |               |                   |
| cardiopulmonary disease            |               | 13 (10.4%)        |
| decompensated liver cirrhosis      |               | 9 (7.2%)          |
| non-sepsis other                   |               | 29 (23.2%)        |

**Supplementary Table 1B.** Disease etiology population (> 65 years)

|                                    | <b>sepsis</b> | <b>non-sepsis</b> |
|------------------------------------|---------------|-------------------|
|                                    | n=60          | n=33              |
| <b>Sepsis critical illness</b>     |               |                   |
| Source of infection n (%)          |               |                   |
| Pulmonary                          | 37 (39.8%)    |                   |
| Abdominal                          | 11 (11.8%)    |                   |
| Urogenital                         | 0 (0%)        |                   |
| Other                              | 12 (12.9%)    |                   |
| <b>Non-sepsis critical illness</b> |               |                   |
| n (%)                              |               |                   |
| cardiopulmonary disease            |               | 16 (17.2%)        |
| decompensated liver cirrhosis      |               | 3 (3.2%)          |
| non-sepsis other                   |               | 14 (15.1%)        |
